# Supplementary material for: Two New Bromophenols with Radical Scavenging Activity from Marine Red Alga Symphyocladia latiuscula
Source: MDPI journal article supplement (doi:10.3390/md11030842), 2013-03-13
Supplement: s1 [file s1]

marinedrugs-11-00842-s001.mol
  corina  04161405443D 1   1.00000     0.00000 
CORINA 3.49 0023  12.04.2013
 23 23  0  0  0  0  0  0  0  0999 V2000
   -0.0167    1.3819    0.0096 C   0  0  0  0  0  0  0  0  0  0  0  0
    0.0021   -0.0041    0.0020 C   0  0  0  0  0  0  0  0  0  0  0  0
    1.2177   -0.6804   -0.0132 C   0  0  0  0  0  0  0  0  0  0  0  0
    2.4055    0.0342   -0.0207 C   0  0  0  0  0  0  0  0  0  0  0  0
    2.3808    1.4174   -0.0126 C   0  0  0  0  0  0  0  0  0  0  0  0
    1.1726    2.0901    0.0021 C   0  0  0  0  0  0  0  0  0  0  0  0
    4.0597   -0.8817   -0.0414 Br  0  0  0  0  0  0  0  0  0  0  0  0
    4.0794    2.4518   -1.4032 N   0  0  0  0  0  0  0  0  0  0  0  0
    3.6731    2.1927   -0.0198 C   0  0  0  0  0  0  0  0  0  0  0  0
    5.5873    3.3732   -2.9286 N   0  0  0  0  0  0  0  0  0  0  0  0
    5.2135    3.1348   -1.6558 C   0  0  0  0  0  0  0  0  0  0  0  0
    7.0104    4.2466   -4.7156 C   0  0  0  0  0  0  0  0  0  0  0  0
    6.8201    4.1156   -3.2031 C   0  0  0  0  0  0  0  0  0  0  0  0
    7.6727    4.6719   -7.2469 O   0  0  0  0  0  0  0  0  0  0  0  0
    8.4854    5.1510   -6.4920 C   0  0  0  0  0  0  0  0  0  0  0  0
    8.2978    5.0220   -5.0023 C   0  0  0  0  0  0  0  0  0  0  0  0
    9.6711    5.8837   -8.4250 C   0  0  0  0  0  0  0  0  0  0  0  0
    9.5552    5.7982   -6.9802 O   0  0  0  0  0  0  0  0  0  0  0  0
    5.8993    3.5360   -0.7355 O   0  0  0  0  0  0  0  0  0  0  0  0
    1.1453    3.9809    0.0131 Br  0  0  0  0  0  0  0  0  0  0  0  0
    1.2408   -2.0405   -0.0203 O   0  0  0  0  0  0  0  0  0  0  0  0
   -1.1656   -0.7014    0.0099 O   0  0  0  0  0  0  0  0  0  0  0  0
   -1.6670    2.3052    0.0225 Br  0  0  0  0  0  0  0  0  0  0  0  0
  1  2  2  0      
  2  3  1  0      
  3  4  2  0      
  4  5  1  0      
  5  6  2  0      
  6  1  1  0      
  4  7  1  0      
  8  9  1  0      
  9  5  1  0      
 10 11  1  0      
 11  8  1  0      
 12 13  1  0      
 13 10  1  0      
 14 15  2  0      
 15 16  1  0      
 16 12  1  0      
 17 18  1  0      
 18 15  1  0      
 11 19  2  0      
  6 20  1  0      
  3 21  1  0      
  2 22  1  0      
  1 23  1  0      
M  END
$$$$
