# Supplementary material for: Two New Bromophenols with Radical Scavenging Activity from Marine Red Alga Symphyocladia latiuscula
Source: MDPI journal article supplement (doi:10.3390/md11030842), 2013-03-13
Supplement: s2 [file s2]

marinedrugs-11-00842-s001.mol
  ChemDraw03251423332D

 23 23  0  0  0  0  0  0  0  0999 V2000
   -3.9296    0.4125    0.0000 C   0  0  0  0  0  0  0  0  0  0  0  0
   -3.9296   -0.4125    0.0000 C   0  0  0  0  0  0  0  0  0  0  0  0
   -3.2151   -0.8250    0.0000 C   0  0  0  0  0  0  0  0  0  0  0  0
   -2.5006   -0.4125    0.0000 C   0  0  0  0  0  0  0  0  0  0  0  0
   -2.5006    0.4125    0.0000 C   0  0  0  0  0  0  0  0  0  0  0  0
   -3.2151    0.8250    0.0000 C   0  0  0  0  0  0  0  0  0  0  0  0
   -1.7862   -0.8250    0.0000 Br  0  0  0  0  0  0  0  0  0  0  0  0
   -1.0717    0.4125    0.0000 N   0  0  0  0  0  0  0  0  0  0  0  0
   -1.7862    0.8250    0.0000 C   0  0  0  0  0  0  0  0  0  0  0  0
    0.3572    0.4125    0.0000 N   0  0  0  0  0  0  0  0  0  0  0  0
   -0.3572    0.8250    0.0000 C   0  0  0  0  0  0  0  0  0  0  0  0
    1.7862    0.4125    0.0000 C   0  0  0  0  0  0  0  0  0  0  0  0
    1.0717    0.8250    0.0000 C   0  0  0  0  0  0  0  0  0  0  0  0
    3.2151   -0.4125    0.0000 O   0  0  0  0  0  0  0  0  0  0  0  0
    3.2151    0.4125    0.0000 C   0  0  0  0  0  0  0  0  0  0  0  0
    2.5006    0.8250    0.0000 C   0  0  0  0  0  0  0  0  0  0  0  0
    4.6441    0.4125    0.0000 C   0  0  0  0  0  0  0  0  0  0  0  0
    3.9296    0.8250    0.0000 O   0  0  0  0  0  0  0  0  0  0  0  0
   -0.3572    1.6500    0.0000 O   0  0  0  0  0  0  0  0  0  0  0  0
   -3.2151    1.6500    0.0000 Br  0  0  0  0  0  0  0  0  0  0  0  0
   -3.2151   -1.6500    0.0000 O   0  0  0  0  0  0  0  0  0  0  0  0
   -4.6441   -0.8250    0.0000 O   0  0  0  0  0  0  0  0  0  0  0  0
   -4.6441    0.8250    0.0000 Br  0  0  0  0  0  0  0  0  0  0  0  0
  1  2  2  0      
  2  3  1  0      
  3  4  2  0      
  4  5  1  0      
  5  6  2  0      
  6  1  1  0      
  4  7  1  0      
  8  9  1  0      
  9  5  1  0      
 10 11  1  0      
 11  8  1  0      
 12 13  1  0      
 13 10  1  0      
 14 15  2  0      
 15 16  1  0      
 16 12  1  0      
 17 18  1  0      
 18 15  1  0      
 11 19  2  0      
  6 20  1  0      
  3 21  1  0      
  2 22  1  0      
  1 23  1  0      
M  END
