# Supplementary material for: Two New Bromophenols with Radical Scavenging Activity from Marine Red Alga Symphyocladia latiuscula
Source: MDPI journal article supplement (doi:10.3390/md11030842), 2013-03-13
Supplement: s3 [file s3]

marinedrugs-11-00842-s002.mol
  corina  04161405443D 1   1.00000     0.00000 
CORINA 3.49 0023  12.04.2013
 24 24  0  0  0  0  0  0  0  0999 V2000
   -1.6770    1.9477    0.1608 O   0  0  0  0  0  0  0  0  0  0  0  0
   -1.2375    0.6768    0.2466 C   0  0  0  0  0  0  0  0  0  0  0  0
   -2.1314   -0.4392   -0.1182 C   0  0  0  0  0  0  0  0  0  0  0  0
   -1.6619   -1.6974   -0.1356 C   0  0  0  0  0  0  0  0  0  0  0  0
   -0.2556   -1.9653    0.2223 C   0  0  0  0  0  0  0  0  0  0  0  0
    0.0199   -2.3885    1.3268 O   0  0  0  0  0  0  0  0  0  0  0  0
   -2.5714   -2.8357   -0.5206 C   0  0  0  0  0  0  0  0  0  0  0  0
   -2.0142   -3.5359   -1.7331 C   0  0  0  0  0  0  0  0  0  0  0  0
   -1.0098   -3.1214   -2.2617 O   0  0  0  0  0  0  0  0  0  0  0  0
    0.7229   -1.7402   -0.6764 O   0  0  0  0  0  0  0  0  0  0  0  0
   -2.6679   -3.8267    0.6411 C   0  0  0  0  0  0  0  0  0  0  0  0
   -2.6336   -4.6199   -2.2259 O   0  0  0  0  0  0  0  0  0  0  0  0
   -3.3842   -3.1774    1.7971 C   0  0  0  0  0  0  0  0  0  0  0  0
   -2.6608   -2.6797    2.8650 C   0  0  0  0  0  0  0  0  0  0  0  0
   -3.3133   -2.0783    3.9259 C   0  0  0  0  0  0  0  0  0  0  0  0
   -4.6959   -1.9729    3.9196 C   0  0  0  0  0  0  0  0  0  0  0  0
   -5.4236   -2.4732    2.8451 C   0  0  0  0  0  0  0  0  0  0  0  0
   -4.7635   -3.0754    1.7848 C   0  0  0  0  0  0  0  0  0  0  0  0
   -5.7489   -3.7569    0.3218 Br  0  0  0  0  0  0  0  0  0  0  0  0
   -5.3391   -1.3821    4.9623 O   0  0  0  0  0  0  0  0  0  0  0  0
   -2.3200   -1.4001    5.3851 Br  0  0  0  0  0  0  0  0  0  0  0  0
   -6.7800   -2.3725    2.8347 O   0  0  0  0  0  0  0  0  0  0  0  0
   -2.0407   -5.2431   -3.3957 C   0  0  0  0  0  0  0  0  0  0  0  0
   -0.1058    0.4498    0.6242 O   0  0  0  0  0  0  0  0  0  0  0  0
  1  2  1  0      
  2  3  1  0      
  3  4  2  0      
  4  5  1  0      
  5  6  2  0      
  4  7  1  0      
  7  8  1  0      
  8  9  2  0      
 10  5  1  0      
  7 11  1  0      
 12  8  1  0      
 13 14  1  0      
 14 15  2  0      
 15 16  1  0      
 16 17  2  0      
 17 18  1  0      
 18 13  2  0      
 11 13  1  0      
 18 19  1  0      
 16 20  1  0      
 15 21  1  0      
 17 22  1  0      
 12 23  1  0      
  2 24  2  0      
M  END
$$$$
