# Supplementary material for: Two New Bromophenols with Radical Scavenging Activity from Marine Red Alga Symphyocladia latiuscula
Source: MDPI journal article supplement (doi:10.3390/md11030842), 2013-03-13
Supplement: s4 [file s4]

marinedrugs-11-00842-s002.mol
  ChemDraw03251423332D

 24 24  0  0  0  0  0  0  0  0999 V2000
   -2.4882    2.4234    0.0000 O   0  0  0  0  0  0  0  0  0  0  0  0
   -2.4882    1.5984    0.0000 C   0  0  0  0  0  0  0  0  0  0  0  0
   -1.7737    1.1859    0.0000 C   0  0  0  0  0  0  0  0  0  0  0  0
   -1.0593    1.5984    0.0000 C   0  0  0  0  0  0  0  0  0  0  0  0
   -1.0593    2.4234    0.0000 C   0  0  0  0  0  0  0  0  0  0  0  0
   -1.7737    2.8359    0.0000 O   0  0  0  0  0  0  0  0  0  0  0  0
   -0.3448    1.1859    0.0000 C   0  0  0  0  0  0  0  0  0  0  0  0
    0.3697    1.5984    0.0000 C   0  0  0  0  0  0  0  0  0  0  0  0
    0.3697    2.4234    0.0000 O   0  0  0  0  0  0  0  0  0  0  0  0
   -0.3448    2.8359    0.0000 O   0  0  0  0  0  0  0  0  0  0  0  0
   -0.3448    0.3609    0.0000 C   0  0  0  0  0  0  0  0  0  0  0  0
    1.0841    1.1859    0.0000 O   0  0  0  0  0  0  0  0  0  0  0  0
    1.0593   -0.7734    0.0000 C   0  0  0  0  0  0  0  0  0  0  0  0
    1.0593   -1.5984    0.0000 C   0  0  0  0  0  0  0  0  0  0  0  0
    1.7737   -2.0109    0.0000 C   0  0  0  0  0  0  0  0  0  0  0  0
    2.4882   -1.5984    0.0000 C   0  0  0  0  0  0  0  0  0  0  0  0
    2.4882   -0.7734    0.0000 C   0  0  0  0  0  0  0  0  0  0  0  0
    1.7737   -0.3609    0.0000 C   0  0  0  0  0  0  0  0  0  0  0  0
    1.7737    0.4641    0.0000 Br  0  0  0  0  0  0  0  0  0  0  0  0
    3.0716   -2.1818    0.0000 O   0  0  0  0  0  0  0  0  0  0  0  0
    1.7737   -2.8359    0.0000 Br  0  0  0  0  0  0  0  0  0  0  0  0
    3.2027   -0.3609    0.0000 O   0  0  0  0  0  0  0  0  0  0  0  0
    1.7986    1.5984    0.0000 C   0  0  0  0  0  0  0  0  0  0  0  0
   -3.2027    1.1859    0.0000 O   0  0  0  0  0  0  0  0  0  0  0  0
  1  2  1  0      
  2  3  1  0      
  3  4  2  0      
  4  5  1  0      
  5  6  2  0      
  4  7  1  0      
  7  8  1  0      
  8  9  2  0      
 10  5  1  0      
  7 11  1  0      
 12  8  1  0      
 13 14  1  0      
 14 15  2  0      
 15 16  1  0      
 16 17  2  0      
 17 18  1  0      
 18 13  2  0      
 11 13  1  0      
 18 19  1  0      
 16 20  1  0      
 15 21  1  0      
 17 22  1  0      
 12 23  1  0      
  2 24  2  0      
M  END
